# Supplementary material
Source: Royal Society of Chemistry journal article supplement (doi:10.1039/d6dt00107f)
Supplement: d6dt00107f1.pdf [file d6dt00107f1.pdf]

**A novel Cd<sub>4</sub>O<sub>4</sub> cubane cluster-based complex and its bifunctional catalytic activity aiming for artificial photosynthesis**

M. Sooraj, B. Haritha, S.N. Remello, E. Manoj\*

Department of Applied Chemistry, Cochin University of Science and Technology, Kochi, Kerala 682 022, India

---

\* Corresponding author.

*E-mail address:* manoj@cusat.ac.in (E. Manoj).

| <b>Sl. No.</b> | <b>Contents</b>                                                                                                                           | <b>Page no.</b> |
|----------------|-------------------------------------------------------------------------------------------------------------------------------------------|-----------------|
| 1.             | Fig.S1. The crystal packing of complex <b>1</b> observed along the c-axis.                                                                | S3              |
| 2.             | Fig.S2. Relevant hydrogen bonding interactions of complex <b>1</b> , in the lattice observed along the b axis, indicated by dashed lines. | S3              |
| 3.             | Fig. S3. Overlay of the experimental and simulated PXRD patterns of complex <b>1</b> .                                                    | S4              |
| 4.             | Fig. S4. Solution phase UV-vis spectrum of complex <b>1</b> in 10 <sup>-4</sup> M methanol solution.                                      | S4              |
| 5.             | Fig. S5. Experimental (top) and theoretical (bottom) IR spectrum of complex <b>1</b> .                                                    | S5              |
| 6.             | Fig. S6. Experimental (top) and theoretical (bottom) Far IR spectrum of complex <b>1</b> .                                                | S5              |
| 7.             | Fig. S7. ESI-MS spectrum of complex <b>1</b> in methanol, showing relevant peaks.                                                         | S6              |
| 8.             | Fig. S8. 2D fingerprint plots of complex <b>1</b> .                                                                                       | S6              |
| 9.             | Fig. S9. Void surfaces of complex <b>1</b> arising from different isovalues (0.002 au (a) and 0.0008 au (b)) for a unit cell.             | S7              |
| 10.            | Fig. S10. DFT optimized structure of complex <b>1</b> .                                                                                   | S7              |
| 11.            | Fig. S11. Molecular electrostatic potential surface of complex <b>1</b> .                                                                 | S7              |
| 12.            | Fig. S12. LSV control experiment for (a) water oxidation and (b) CO <sub>2</sub> reduction activity of complex <b>1</b> .                 | S8              |
| 13.            | Table S1. Interaction parameters of complex <b>1</b> .                                                                                    | S8              |
| 14.            | Table S2. Hirshfeld surface properties of cadmium cubane cluster.                                                                         | S8              |

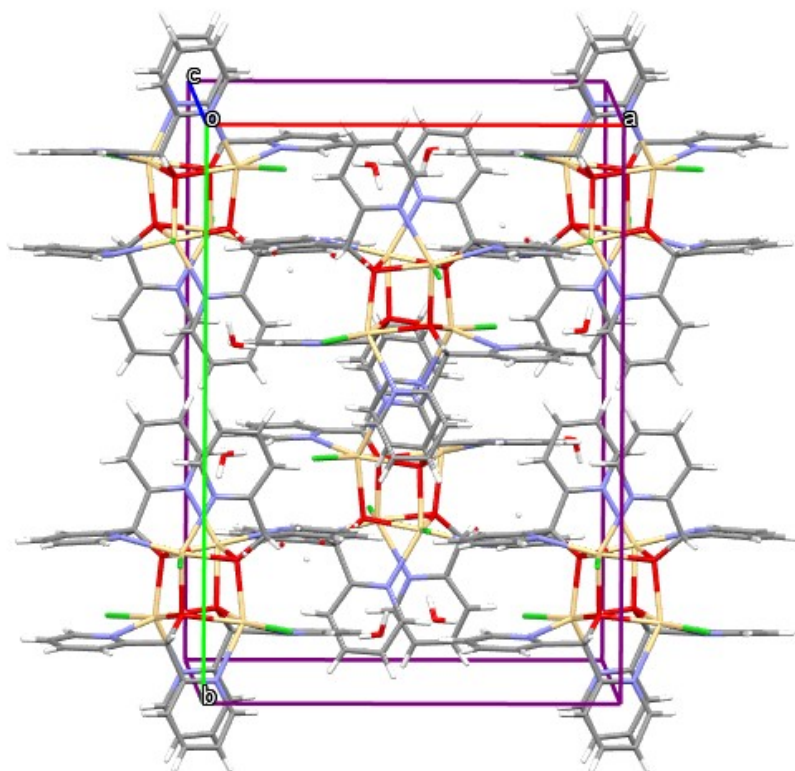

Fig. S1. The crystal packing of complex **1** observed along the c-axis.

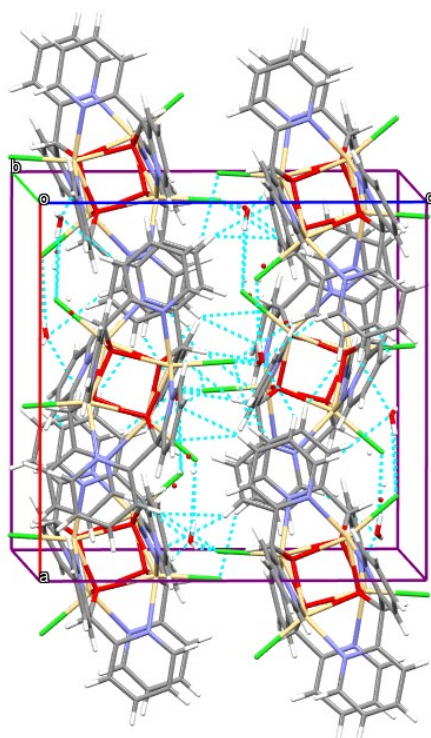

Fig. S2. Relevant hydrogen bonding interactions of complex **1**, in the lattice observed along the b axis, indicated by dashed lines.

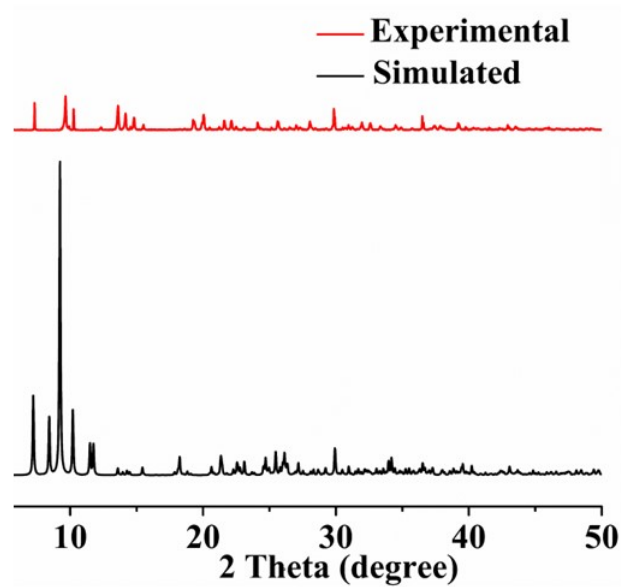

Fig. S3. Overlay of the experimental and simulated PXRD patterns of complex 1.

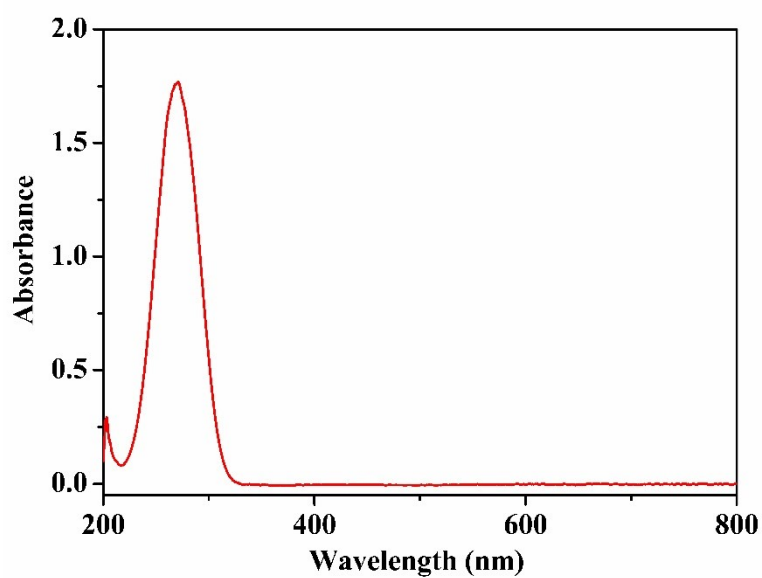

Fig. S4. Solution phase UV-vis spectrum of complex 1 in 10<sup>-4</sup> M methanol solution.

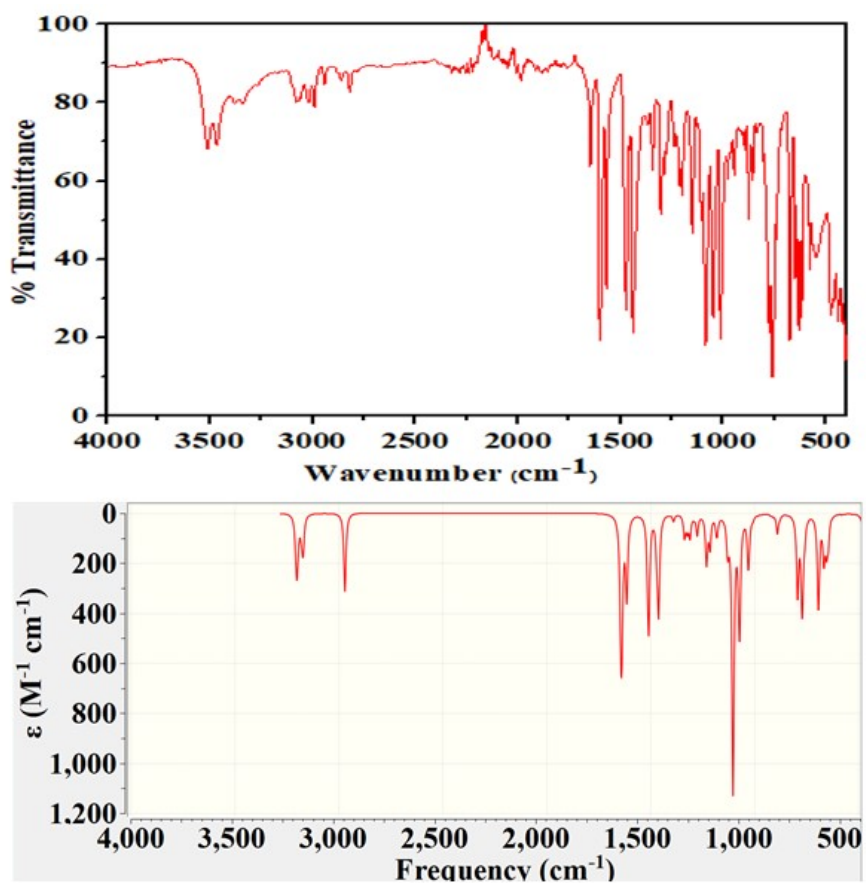

Fig. S5. Experimental (top) and theoretical (bottom) IR spectrum of complex 1.

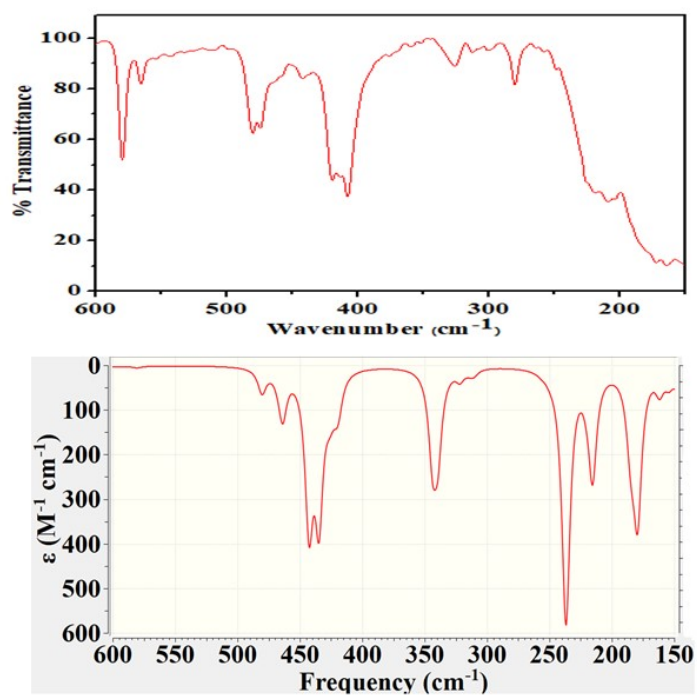

Fig. S6. Experimental (top) and theoretical (bottom) Far IR spectrum of complex 1.

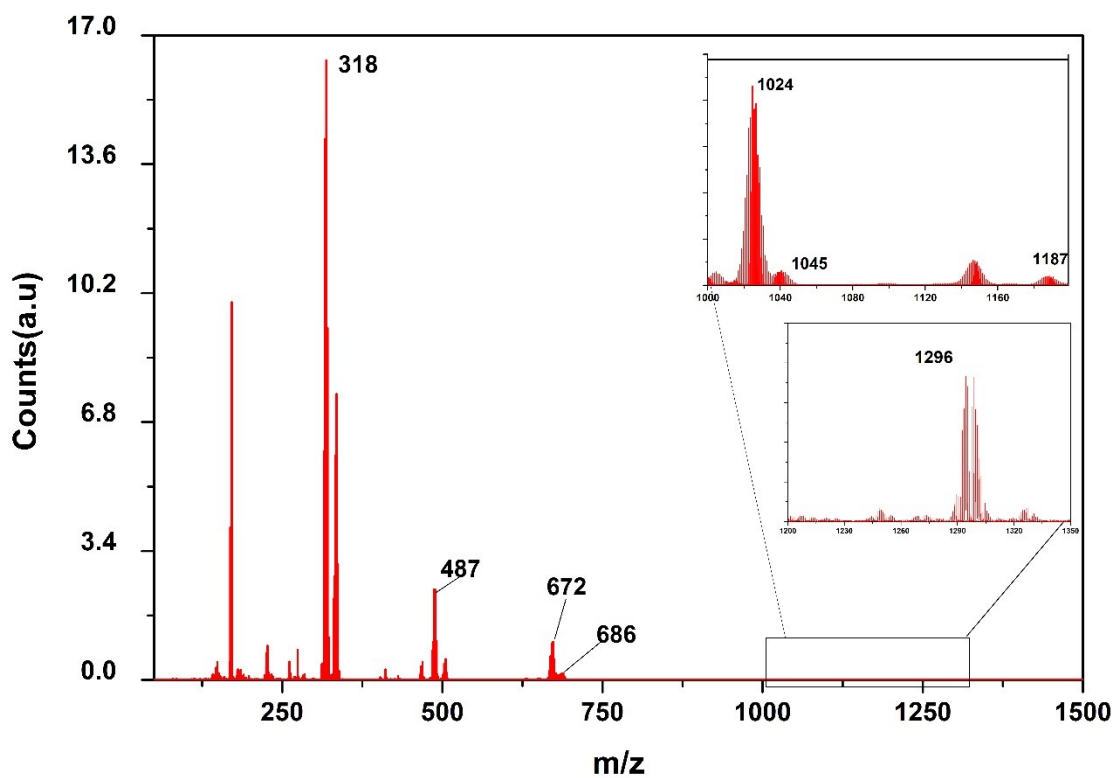

Fig

. S7. ESI-MS spectrum of complex **1** in methanol, showing relevant peaks.

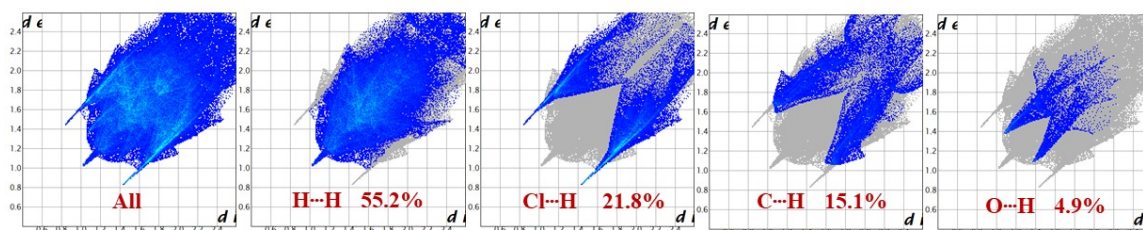

Fig. S8. 2D fingerprint plots of complex **1**.

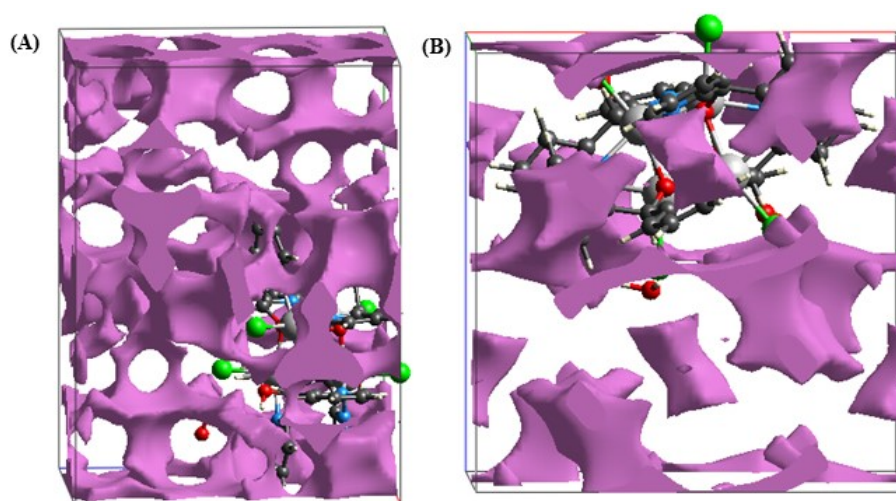

Fig. S9. Void surfaces of complex **1** arising from different isovalues (0.002 au (a) and 0.0008 au (b)) for a unit cell.

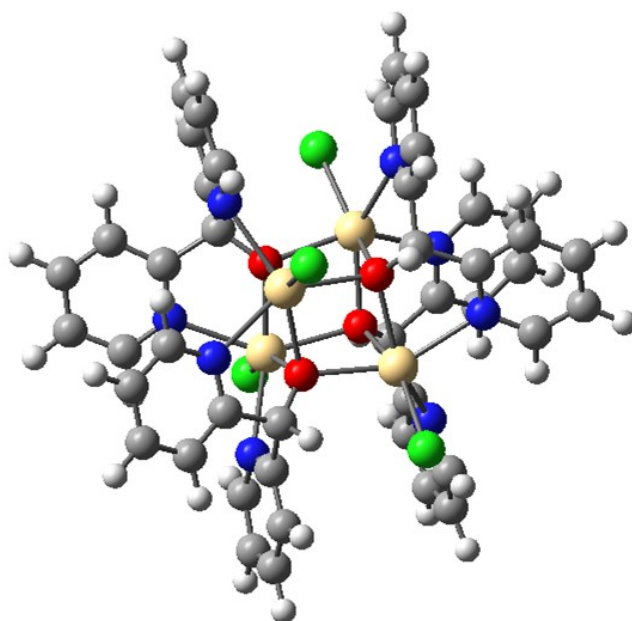

Fig. S10. DFT optimized structure of complex **1**.

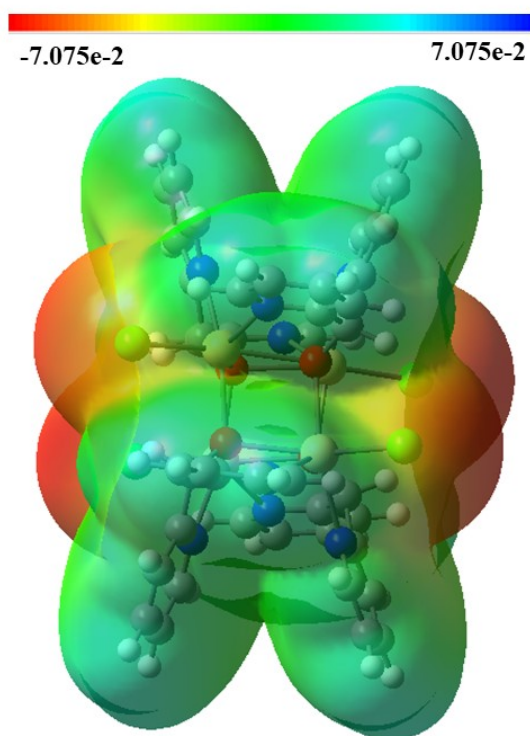

Fig. S11. Molecular electrostatic potential surface of complex **1**.

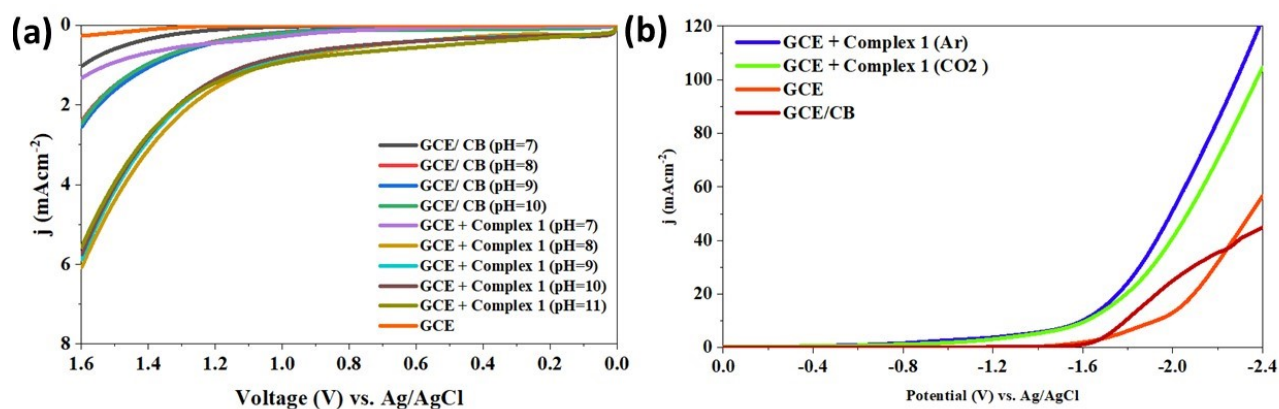

Fig. S12. LSV control experiment for (a) water oxidation and (b) CO<sub>2</sub> reduction activity of complex **1**.

Table S1. Interaction parameters of complex **1**.

| C–H⋯π interactions                                                                                                                                 |         |           |            |           |
|----------------------------------------------------------------------------------------------------------------------------------------------------|---------|-----------|------------|-----------|
| C–H⋯Cg                                                                                                                                             | H⋯Cg(Å) | C⋯Cg(Å)   | C–H⋯Cg(°)  |           |
| C(6')–H(6')⋯Cg(3) <sup>a</sup>                                                                                                                     | 2.97    | 3.934(17) | 162        |           |
| C(6')–H(6')⋯Cg(4) <sup>b</sup>                                                                                                                     | 2.97    | 3.934(17) | 162        |           |
| Equivalent position codes: (a) = x, y, z, (b) = 1-x, y, 1/2-z.                                                                                     |         |           |            |           |
| Hydrogen bonding interactions                                                                                                                      |         |           |            |           |
| D–H⋯A                                                                                                                                              | D–H (Å) | H⋯A (Å)   | D⋯A (Å)    | D–H⋯A (°) |
| O(3)–H(3A)⋯Cl(2) <sup>a</sup>                                                                                                                      | 0.73(3) | 2.54(3)   | 3.2598(17) | 166(3)    |
| O(3)–H(3B)⋯Cl(1) <sup>b</sup>                                                                                                                      | 0.83(4) | 2.45(4)   | 3.2540(17) | 166(3)    |
| C(2)–H(2)⋯O(3) <sup>c</sup>                                                                                                                        | 0.95    | 2.58      | 3.333(3)   | 136       |
| C(10)–H(10)⋯Cl(1) <sup>a</sup>                                                                                                                     | 0.95    | 2.73      | 3.5357(19) | 143       |
| C(11)–H(11)⋯O(1) <sup>a</sup>                                                                                                                      | 0.95    | 2.60      | 3.264(14)  | 127       |
| C(13)–H(13)⋯O(3) <sup>d</sup>                                                                                                                      | 0.95    | 2.59      | 3.348(2)   | 137       |
| A = acceptor, D = donor; Equivalent position codes: (a) = 1/2-x, 1/2-y, 1/2+z, (b) = 1-x, y, 1/2-z, (c) = x, -y, -1/2+z, (d) = -1/2+x, 1/2-y, 1-z. |         |           |            |           |

Table S2. Hirshfeld surface properties of cadmium cubane cluster.

| Compound         | Volume (Å <sup>3</sup> ) | Area (Å <sup>2</sup> ) | Globularity (G) | Asphericity (Ω) |
|------------------|--------------------------|------------------------|-----------------|-----------------|
| Complex <b>1</b> | 1174.60                  | 687.03                 | 0.784           | 0.030           |
